# Supplementary material for: Validation and assessment of variant calling pipelines for next-generation sequencing
Source: PubMed Central journal article supplement (PMC4129436; doi:10.1186/1479-7364-8-14), 2014-07-30
Supplement: 1479-7364-8-14-S1.pdf [file 1479-7364-8-14-S1.pdf]

# Whole Exome Sequencing Analysis Pipeline

Please visit our wiki site (<http://metamoodics.org/wes>) for the latest updates and access to the source code.

The pipeline contains the following steps:

- Mapping
- Filtering
- Realign/recalibration
- variant calling

## Mapping

---

1. **Mapping** : Align short sequences to the human reference genome sequence database.

```
Align first batch
$bwa aln -l 30 -t $CPUs $hg19_ref $fastq_path1/$fastq_for_gz > $PWDS/fastq1.sai

Align second batch
$bwa aln -l 30 -t $CPUs $hg19_ref $fastq_path1/$fastq_rev_gz > $PWDS/fastq2.sai

Paired-end first batch
$bwa sampe $hg19_ref $PWDS/fastq1.sai $PWDS/fastq2.sai $fastq_path1/$fastq_for_gz
$fastq_path1/$fastq_rev_gz | gzip > $PWDS/${subjectID}.sam.gz

Sorting bam
${samtools} view -us $PWDS/${subjectID}.sam.gz | ${samtools} sort -m 3000000000 -
$PWDS/${subjectID}.srt

Indexing bam
${samtools} index ${PWDS}/${subjectID}.srt.bam

Generate stat
${bamtools} stats -insert -in $PWDS/${subjectID}.srt.bam > $PWDS/${subjectID}.srt.stats
```

2. **Fixmate** : Fixing the mate pairs information to ensure that all mate-pair information is in sync between each read and its mate pair.

```
# Using Picard fixmate

java -Xmx${heap}m -Djava.io.tmpdir\=${tmp_folder}_fixmate \
-jar ${picard}/FixMateInformation.jar \
INPUT\=${PWDS}/${subjectID}.srt.bam \
OUTPUT\=${PWDS}/${subjectID}.fxmt.bam \
SO\=coordinate \
CREATE_INDEX\=true \
VALIDATION_STRINGENCY\=SILENT
```

# Filtering

---

1. [Filter](#) : Filtering for mapping, pairing, and proper paired

```
$(bamtools) filter \  
-isMapped true \  
-isPaired true \  
-isProperPair true \  
-in $PWDS/${subjectID}.fxmt.bam \  
-out $PWDS/${subjectID}.fxmt.flt.bam
```

2. [Remove duplicate](#) : Examines aligned records in the BAM file to locate duplicate reads and remove them.

```
java -Xmx$(heap)m -Djava.io.tmpdir=${tmp_folder}_rmdup \  
-jar ${picard}/MarkDuplicates.jar \  
I=${PWDS}/${subjectID}.fxmt.flt.bam \  
O=${PWDS}/${subjectID}.rmdup.bam \  
M=${PWDS}/${subjectID}.duplicate_report.txt \  
VALIDATION_STRINGENCY=SILENT \  
REMOVE_DUPLICATES=true
```

3. [Filter low mapping quality](#) : Filter low mapping quality reads

```
$bamtools filter \  
-mapQuality ">=60" \  
-in $PWDS/${subjectID}.rmdup.bam \  
-out $PWDS/${subjectID}.mq.srt.bam
```

# Realign/Recalibration

---

1. [Create intervals](#) : Collect regions around potential indels and clusters of mismatches. Determine small suspicious intervals which are likely in need of realignment.

```
java -Xmx$(heap)m -Djava.io.tmpdir=${tmp_folder}_realign \  
-jar $gatk \  
-T RealignerTargetCreator \  
-I $PWDS/${subjectID}.mq.srt.bam \  
-R $REF \  
-known $DBSNP \  
-nt $CPUs \  
-o $PWDS/${subjectID}.forRealign.intervals \  
-L $ExonFile
```

2. [Realignment](#) : Run the realigner over the intervals to create a cleaned version of the BAM file.

```
java -Xmx$(heap)m -Djava.io.tmpdir=${tmp_folder}_realign \  
-jar $gatk \  
-I $PWDS/${subjectID}.mq.srt.bam \  
-R $REF \  
-T IndelRealigner \  
-targetIntervals $PWDS/${subjectID}.forRealign.intervals \  
--out $PWDS/${subjectID}.realigned.bam \  
-known $DBSNP \  
-LOD 0.4 \  
-compress 5 \  
-l INFO \  
-L $ExonFile
```

3. Analysis of covariates : Determine the covariates affecting base quality scores in the BAM file.

```
java -Xmx${heap}m -Djava.io.tmpdir\=${tmp_folder}_covar \  
-jar $gatk \  
-R $REF \  
-l INFO \  
-I $PWDS/${subjectID}.realigned.srt.bam \  
-knownSites $DBSNP \  
-T CountCovariates \  
-nt $CPUs \  
-cov ReadGroupCovariate \  
-cov QualityScoreCovariate \  
-cov CycleCovariate \  
-cov DinucCovariate \  
-recalFile $PWDS/${subjectID}.flt.recal_v1.csv \  
-L $ExonFile
```

4. Recalibration : Walking through the BAM file and rewrite the quality scores.

```
java -Xmx${heap}m -Djava.io.tmpdir\=${tmp_folder}_recal \  
-jar $gatk \  
-l INFO \  
-R $REF \  
-I $PWDS/${subjectID}.realigned.srt.bam \  
-T TableRecalibration \  
--default_platform Illumina \  
--default_read_group MP1 \  
--out $PWDS/${subjectID}.realigned.recal.bam \  
-recalFile $PWDS/${subjectID}.flt.recal_v1.csv \  
-L $ExonFile
```

5. Recalculate analysis of covariates : Determine the covariates affecting base quality scores in the realigned recalibrated BAM file for the comparison.

```
java -Xmx${heap}m -Djava.io.tmpdir\=${tmp_folder}_covar \  
-jar $gatk \  
-R $REF \  
-I $PWDS/${subjectID}.realigned.recal.bam \  
-knownSites ${DBSNP} \  
-T CountCovariates \  
-nt $CPUs \  
-cov ReadGroupCovariate \  
-cov QualityScoreCovariate \  
-cov CycleCovariate \  
-cov DinucCovariate \  
-recalFile $PWDS/${subjectID}.flt.recal_v2.csv \  
-L $ExonFile
```

6. Depth of coverage : Determine coverage summarized by mean, median, quartiles, and/or percentage of bases covered.

```
java -Xmx${heap}m -Djava.io.tmpdir\=${tmp_folder}_dept \  
-jar $gatk \  
-T DepthOfCoverage \  
-L $ExonFile \  
-l INFO \  
-R $REF \  
-I $PWDS/${subjectID}.realigned.recal.bam \  
-o $PWDS/${subjectID}.coverage.dept \  
-L $ExonFile
```

## 7. DoC for genes : Determine coverage on genes

```
java -Xmx4g -jar GenomeAnalysisTK.jar \
-R ucsc.hg19.fasta \
-T DepthOfCoverage \
-o ${i}.depthofcoverage \
-I ${i}.realigned.recal.bam \
-geneList refGene.sorted.txt \
-ct 6 -ct 8 -ct 10 -ct 20 \
-L exon.target.interval_list \
-omitBaseOutput \
-omitLocusTable
```

## 8. HsMetrics : Calculates a set of Hybrid Selection specific metrics from an aligned BAM file.

```
java -Xmx${heap}m -jar ${picard}/CalculateHsMetrics.jar \
BAIT_INTERVALS=${BaitFilePicard} \
TARGET_INTERVALS=${ExonFilePicard} \
INPUT=${PWD}/${subjectID}.realigned.recal.bam \
OUTPUT=${PWD}/${subjectID}.realigned.recal.hsmetrics
```

# Variant calling

---

## 1. Calling variants

- Generate snps raw vcf file: Using GATK UnifiedGenotyper to generate snps.raw.vcf

```
java -Xmx${heap}m \
-jar $gatk \
-R $REF \
-T UnifiedGenotyper \
--dbsnp $DBSNP \
-I ${PWD}/${subjectID}.realigned.recal.bam \
--out ${PWD}/variants/${subjectID}.snps.raw.vcf \
-stand_call_conf 30.0 \
-stand_emit_conf 10.0 \
-out_mode EMIT_VARIANTS_ONLY \
-l INFO \
-A DepthOfCoverage \
-A HaplotypeScore \
-A InbreedingCoeff \
-glm SNP \
-nt 1 \
-L $ExonFile
```

- Generate indels raw vcf file: Using GATK UnifiedGenotyper to generate indels.raw.vcf

```
java -Xmx${heap}m \  
-jar $gatk \  
-R $REF \  
-T UnifiedGenotyper \  
--dbsnp $DBSNP \  
-I $PWDS/${subjectID}.realigned.recal.bam \  
--out $PWDS/variants/${subjectID}.indels.raw.vcf \  
-stand_call_conf 30.0 \  
-stand_emit_conf 10.0 \  
-out_mode EMIT_VARIANTS_ONLY \  
-l INFO \  
-A DepthOfCoverage \  
-A HaplotypeScore \  
-A InbreedingCoeff \  
-glm INDEL \  
-nt 1 \  
-L $ExonFile
```

- Variant filtration generate indels and indels.PASS files

```
java -Xmx${heap}m \  
-jar $gatk \  
-l INFO -T VariantFiltration \  
-R $REF \  
-o $PWDS/variants/${subjectID}.indels.vcf \  
-V:VCF $PWDS/variants/${subjectID}.indels.raw.vcf \  
--filterExpression "QD < 2.0" \  
--filterName "QDFilter" \  
--filterExpression "ReadPosRankSum < -20.0" \  
--filterName "ReadPosFilter" \  
--filterExpression "FS > 200.0" \  
--filterName "FSFilter" \  
--filterExpression "MQ0 >= 4 && ((MQ0 / (1.0 * DP)) > 0.1)" \  
--filterName "HARD_TO_VALIDATE" \  
--filterExpression "QUAL < 30.0 || DP < 6 || DP > 5000 || HRun > 5" \  
--filterName "QualFilter"
```

- Variant filtration generate snps and snps.PASS files

```
java -Xmx${heap}m \  
-jar $gatk \  
-l OFF -T VariantFiltration \  
-R $REF \  
-o $PWDS/variants/${subjectID}.snps.vcf \  
--variant $PWDS/variants/${subjectID}.snps.raw.vcf \  
--mask $PWDS/variants/${subjectID}.indels.PASS.vcf \  
--maskName InDel \  
--clusterSize 3 \  
--clusterWindowSize 10 \  
--filterExpression "QD < 2.0" \  
--filterName "QDFilter" \  
--filterExpression "MQ < 40.0" \  
--filterName "MQFilter" \  
--filterExpression "FS > 60.0" \  
--filterName "FSFilter" \  
--filterExpression "HaplotypeScore > 13.0" \  
--filterName "HaplotypeScoreFilter" \  
--filterExpression "MQRankSum < -12.5" \  
--filterName "MQRankSumFilter" \  
--filterExpression "ReadPosRankSum < -8.0" \  
--filterName "ReadPosRankSumFilter" \  
--filterExpression "QUAL < 30.0 || DP < 6 || DP > 5000 || HRun > 5" \  
--filterName "StandardFilters" \  
--filterExpression "MQ0 >= 4 && ((MQ0 / (1.0 * DP)) > 0.1)" \  
--filterName "HARD_TO_VALIDATE"
```

- evaluating snps: Using GATK snps eval to generate snps.PASS.vcf.eval file

```
java -Xmx${heap}m \  
-jar $gatk \  
-T VariantEval \  
--dbsnp $DBSNP \  
-R $REF \  
-eval $PWDS/variants/${subjectID}.snps.PASS.vcf \  
-o $PWDS/variants/${subjectID}.snps.PASS.vcf.eval
```

## 2. Group Calling and Variant Recalibration

### ▪ UnifiedGenotyper Group Calling

```
# SNPs

java -Xmx32g -Djava.io.tmpdir=/md1/BSI-SZ/analysis/tmp1 \
-jar $GATK \
-l INFO -L $targets_intervals -nt 2 \
-R $hg19_ref \
-I /md1/D12PEACXX_1_ACAGTG.realigned.recal.bam.g.bam \
-I /md1/D12PEACXX_1_ACTTGA.realigned.recal.bam.g.bam \
.
. (list all bam files here)
.
-I /md1/D12PEACXX_8_TAGCTT.realigned.recal.bam.g.bam \
-I /md1/D12PEACXX_8_TGACCA.realigned.recal.bam.g.bam \
-I /md1/D12PEACXX_8_TTAGGC.realigned.recal.bam.g.bam \
--dbsnp $dbsnp \
-T UnifiedGenotyper -glm $glmnode \
-dcov 250 -out_mode EMIT_VARIANTS_ONLY \
--max_alternate_alleles 10 \
-o $outfile \
-stand_call_conf 30 -stand_emit_conf 10

# Indels

java -Xmx32g -Djava.io.tmpdir=/md1/BSI-SZ/analysis/tmp2 \
-jar $GATK \
-l INFO -L $targets_intervals -nt 8 \
-R $hg19_ref \
-I /md1/D12PEACXX_1_ACAGTG.realigned.recal.bam.g.bam \
-I /md1/D12PEACXX_1_ACTTGA.realigned.recal.bam.g.bam \
-I /md1/D12PEACXX_1_ATCACG.realigned.recal.bam.g.bam \
.
. (list all bam files here)
.
-I /md1/D12PEACXX_8_TGACCA.realigned.recal.bam.g.bam \
-I /md1/D12PEACXX_8_TTAGGC.realigned.recal.bam.g.bam \
--dbsnp $dbsnp \
-T UnifiedGenotyper -glm $glmnode \
-dcov 250 -out_mode EMIT_VARIANTS_ONLY \
--max_alternate_alleles 10 \
-o $outfile \
-stand_call_conf 30 -stand_emit_conf 10
```

▪ Variant Recalibration

```
# Variant Recalibrator for SNPs

java -Xmx32g -Djava.io.tmpdir=$wdir/tmp1 \
-jar $GATK/GenomeAnalysisTK.jar \
-l INFO -L $targets_intervals -nt 4 \
-R $hg19_ref \
-T VariantRecalibrator \
-input $wdir/$input_rawSNP \
--maxGaussians 6 \
-resource:hapmap,known=false,training=true,truth=true,prior=15.0 \
  $GATK/resources/hg19/hapmap_3.3.hg19.vcf \
-resource:omni,known=false,training=true,truth=false,prior=12.0 \
  $GATK/resources/hg19/1000G_omni2.5.hg19.vcf \
-resource:dbsnp,known=true,training=false,truth=false,prior=6.0 \
  $GATK/resources/hg19/dbsnp_137.hg19.vcf \
-an QD -an MQRankSum -an ReadPosRankSum -an FS -an MQ -an DP \
-an InbreedingCoeff -an HaplotypeScore \
-mode SNP \
-recalFile $wdir/bsi.SNPPrecal.vcf \
-tranchesFile $wdir/bsi.SNPPrecal.tranches \
-rscriptFile $wdir/bsi.SNPPrecal.plots.R

# Variant Recalibrator for Indels

java -Xmx32g -Djava.io.tmpdir=$wdir/tmp2 \
-jar $GATK/GenomeAnalysisTK.jar \
-l INFO -L $targets_intervals -nt 4 \
-R $hg19_ref \
-T VariantRecalibrator \
-input $wdir/$input_rawINDEL \
--maxGaussians 1 \
-percentBad 0.15 --minNumBadVariants 500 \
-resource:mills,VCF,known=false,training=true,truth=true,prior=12.0 \
  $GATK/resources/hg19/Mills_and_1000G_gold_standard.indels.hg19.vcf \
-resource:dbsnp,known=true,training=false,truth=false,prior=2.0 \
  $GATK/resources/hg19/dbsnp_137.hg19.vcf \
-an DP -an FS -an ReadPosRankSum -an MQRankSum \
-an QD -an ReadPosRankSum \
-an InbreedingCoeff \
-mode INDEL \
-recalFile $wdir/bsi.Indelrecal.vcf \
-tranchesFile $wdir/bsi.Indelrecal.tranches \
-rscriptFile $wdir/bsi.Indelrecal.plots.R
```



## ▪ Apply Recalibration

```
# Apply Recalibration for SNPs

java -Xmx32g -Djava.io.tmpdir=$wdir/tmp1 \
-jar $GATK/GenomeAnalysisTK.jar \
-l INFO -L $targets_intervals -nt 4 \
-R $hg19_ref \
-T ApplyRecalibration \
-input $wdir/$input_rawSNP \
--ts_filter_level 99.0 \
-recalFile $wdir/bsi.SNPrecal.vcf \
-tranchesFile $wdir/bsi.SNPrecal.tranches \
-mode SNP \
-o $wdir/bsi.VarRecalfiltSNP.vcf

# Apply Recalibration for Indels

java -Xmx32g -Djava.io.tmpdir=$wdir/tmp2 \
-jar $GATK/GenomeAnalysisTK.jar \
-l INFO -L $targets_intervals -nt 4 \
-R $hg19_ref \
-T ApplyRecalibration \
-input $wdir/$input_rawINDEL \
--ts_filter_level 95.0 \
-recalFile $wdir/bsi.Indelrecal.vcf \
-tranchesFile $wdir/bsi.Indelrecal.tranches \
-mode INDEL \
-o $wdir/bsi.VarRecalfiltIndel.vcf
```

## ▪ Variant Evaluation

```
# Variant Eval for SNPs

java -Xmx32g -Djava.io.tmpdir=$wdir/tmp1 \
-jar $GATK/GenomeAnalysisTK.jar \
-l INFO -L $targets_intervals -nt 4 \
-R $hg19_ref \
-T VariantEval \
--dbsnp $dbsnp_ex \
-eval $wdir/bsi.VarRecalfiltSNP.vcf \
-o $wdir/bsi.Final_SNP.gatkreport

# Variant Eval for Indels

java -Xmx32g -Djava.io.tmpdir=$wdir/tmp2 \
-jar $GATK/GenomeAnalysisTK.jar \
-l INFO -L $targets_intervals -nt 4 \
-R $hg19_ref \
-T VariantEval \
--dbsnp $dbsnp_ex \
-eval $wdir/bsi.VarRecalfiltIndel.vcf \
-o $wdir/bsi.Final_Indel.gatkreport
```

### 3. Annotation snpEff

```
java -Xmx${heap}m \  
-jar snpEff.jar \  
eff \  
-v -i vcf \  
-o vcf \  
-c ${snpEff}/snpEff.config  
GRCh37.65 \  
$PWDS/variants/${subjectID}.snps.PASS.vcf  
  
java -Xmx${heap}m \  
-jar snpEff.jar \  
eff \  
-v -i vcf \  
-o vcf \  
-c ${snpEff}/snpEff.config  
GRCh37.65 \  
$PWDS/variants/${subjectID}.indels.PASS.vcf
```

### 4. Annotation Annovar

```
perl annotate_variation.pl --downdb --buildver hg19 refGene humandb  
perl annotate_variation.pl --downdb --buildver hg19 knownGene humandb  
perl annotate_variation.pl --downdb --buildver hg19 ensGene humandb  
perl annotate_variation.pl --downdb --buildver hg19 1000g humandb/  
perl annotate_variation.pl --downdb --buildver hg19 snp132 humandb/  
perl annotate_variation.pl --downdb --buildver hg19 avsift humandb/  
perl annotate_variation.pl --downdb --buildver hg19 1000g2012feb humandb/  
perl annotate_variation.pl --downdb --buildver hg19 ljb_all --webfrom annovar humandb/  
annotate_variation.pl --downdb --buildver hg19 esp5400_ea -webfrom annovar humandb/  
annotate_variation.pl --downdb --buildver hg19 esp5400_all -webfrom annovar humandb/  
annotate_variation.pl --downdb --buildver hg19 genomicSuperDups humandb/  
annotate_variation.pl --downdb --buildver hg19 phastConsElements46way humandb/  
  
perl /path/to/annovar/summarize_annovar.pl --verdb SNP135 --buildver hg19 \  
/path/to/humandb input.bed --outfile output_sum
```
